## PREP UPTAKE AMONG NPEP USERS IN MONTRÉAL

1           **Pre-exposure prophylaxis uptake among users of non-occupational post-**  
2           **exposure prophylaxis: a longitudinal analysis of attendees at a large sexual**  
3           **health clinic in Montréal**

4  
5   **Authors:** Xia, Yiqing MSc<sup>1</sup>; Greenwald, R. Zoë PhD<sup>2, 3</sup>; Milwid, M. Rachael PhD<sup>1</sup>;  
6   Trottier, Claire DCS<sup>3</sup>; Boissonnault, Michel MD<sup>3</sup>; Gaul, Neil MD<sup>3</sup>; Charest, Louise MD<sup>3</sup>;  
7   Landry, Gabrielle MD<sup>3</sup>; Zahedi, N. Navid MD<sup>3</sup>; Szabo, Jason MD<sup>3,4</sup>; Thomas, Réjean  
8   MD<sup>3</sup>; Maheu-Giroux, Mathieu PhD<sup>1</sup>

9  
10 **Affiliations:**

11           (1) Department of Epidemiology, Biostatistics, and Occupational Health, School of  
12           Population and Global Health, McGill University, Montréal, QC, Canada

13           (2) Department of Epidemiology, Dalla Lana School of Public Health, University of  
14           Toronto, Toronto, ON, Canada

15           (3) Clinique médicale l'Actuel, Montréal, QC, Canada

16           (4) Centre universitaire de santé McGill (CUSM), Montréal, QC, Canada

17 **Correspondence to:**

18   Mathieu Maheu-Giroux, PhD

19   Department of Epidemiology, Biostatistics, and Occupational Health

20   School of Population and Global Health, McGill University

21   1020 Pine Avenue West, Montreal, QC, Canada

## PREP UPTAKE AMONG NPEP USERS IN MONTRÉAL

22 H3A 1A2

23 E-mail: [mathieu.maheu-giroux@mcgill.ca](mailto:mathieu.maheu-giroux@mcgill.ca)

24 Phone: (+1) 514-398-5110

25

### 26 **Conference presentation:**

27 This paper will be presented at the 29<sup>th</sup> Annual Canadian Conference on HIV / AIDS  
28 Research; May 2020; Québec city, QC, Canada.

### 29 **Funding:**

30 This work was supported by the *Canadian Foundation for AIDS Research* and the  
31 *Canadian Institutes of Health Research*. MM-G's research programs was funded by  
32 career awards from the *Fonds de recherche du Québec – Santé*.

### 33 **Conflict of Interest Statement:**

34 In the past years l'Actuel PrEP databank has received funding from ViiV Healthcare  
35 (2016) and *Gilead Sciences Inc.* (2018, 2019). L'Actuel PEP databank has received  
36 funding from ViiV Healthcare (2016). MM-G reports an investigator-sponsored research  
37 grant from *Gilead Sciences Inc.* outside of the submitted work and contractual  
38 arrangements from both the *World Health Organization* and the *Joint United Nations*  
39 *Programme on HIV/AIDS* (UNAIDS), also outside of the submitted work.

40

## PREP UPTAKE AMONG NPEP USERS IN MONTRÉAL

### 41 **Abstract (249 words)**

42 **Background:** Reducing HIV transmission using pre-exposure prophylaxis (PrEP)  
43 requires targeting individuals at high acquisition risk, such as men who have sex with  
44 men (MSM) with a history of non-occupational post-exposure prophylaxis (nPEP). This  
45 study aims to characterize longitudinal trends in PrEP uptake and its determinants  
46 among nPEP users in Montréal.

47 **Methods:** Eligible attendees at *Clinique médicale l'Actuel* were recruited prospectively  
48 starting in October 2000 (nPEP) and January 2013 (PrEP). Linking these cohorts, we  
49 characterized the PEP-to-PrEP cascade, examined the determinants of PrEP uptake  
50 after nPEP consultation using a Cox proportional-hazard model, and assessed whether  
51 PrEP persistence differed by nPEP history using Kaplan-Meier curves.

52 **Results:** As of August 2019, 31% of 2,682 MSM nPEP cohort participants had two or  
53 more nPEP consultations. Subsequent PrEP consultations occurred among 36% of  
54 nPEP users, of which 17% sought nPEP again afterwards. Among 2,718 PrEP cohort  
55 participants, 46% reported previous nPEP use. Among nPEP users, those aged 25-49  
56 years (Hazard Ratio (HR)=1.3, 95% confidence interval (CI): 1.1-1.7), with more nPEP  
57 episodes (HR=1.4, 95%CI: 1.3-1.5), reported chemsex (HR=1.3, 95%CI: 1.1-1.7), with a  
58 STI history (HR=1.5; 95%CI: 1.3-1.7), and who returned for their first nPEP follow-up  
59 visit (HR=3.4, 95%CI: 2.7-4.2) had higher rates of PrEP linkage. There was no  
60 difference in PrEP persistence between PEP-to-PrEP and PrEP only participants.

61 **Conclusion:** Over one-third of nPEP users were subsequently prescribed PrEP.  
62 However, the large proportion of men who repeatedly use nPEP calls for more efficient

## PREP UPTAKE AMONG NPEP USERS IN MONTRÉAL

63 PrEP-linkage services and, among those that use PrEP, improved persistence should  
64 be encouraged.

65 **Keywords:** HIV prevention; non-occupational post-exposure prophylaxis (PEP); pre-  
66 exposure prophylaxis; biomedical prevention; HIV/AIDS; nPEP to PrEP.

## PREP UPTAKE AMONG NPEP USERS IN MONTRÉAL

### 67 **Introduction**

68 In 2016, there were an estimated 2,165 new HIV infections in Canada, of which  
69 approximately half occurred among gay, bisexual, and other men who have sex with  
70 men (gbMSM) [1]. Worldwide, the risk of HIV infection is 27 times higher in gbMSM than  
71 the general population [2]. Addressing the unmet prevention needs of key populations at  
72 high risk of HIV acquisition and transmission -such as gbMSM- remains a priority. In  
73 2017 Montréal signed the Paris declaration and, shortly after, became the first Canadian  
74 city to adopt the UNAIDS Fast-Track City target of zero new HIV infections by 2030 [3].  
75 This ambitious objective will require strengthening the HIV treatment and care cascade  
76 and, crucially, must address unmet HIV prevention needs.

77 Non-occupational post-exposure prophylaxis (nPEP) and pre-exposure prophylaxis  
78 (PrEP) are two strategies for reducing the risk of HIV acquisition which, when combined  
79 with other intervention strategies, could have the potential to achieve HIV elimination [4].  
80 nPEP involves taking a 28-day course of highly active antiretroviral tri-therapy following  
81 an event that could carry a moderate/high risk of acquisition (initiated within 72 hours of  
82 exposure). It was first implemented following occupational exposure in the early 1990s  
83 and was later extended to non-occupational situations such as sexual contacts [5]. In  
84 contrast, PrEP was recommended by the World Health Organization in 2012 as a  
85 strategy for adults who are at a high, ongoing risk of HIV infection [6]. It can be taken  
86 daily, or for gbMSM, intermittently (known as “*on demand PrEP*”) [4 7 8]. Randomized  
87 control trials among gbMSM have estimated an overall PrEP effectiveness of 86% [7 9-  
88 11] for preventing sexual transmission which could reach 99% for those who are  
89 perfectly adherent to treatment guidelines [12].

## PREP UPTAKE AMONG NPEP USERS IN MONTRÉAL

90 Contrary to the use of nPEP as an emergency measure, it is recommended that those  
91 who seek nPEP repeatedly, or are at an ongoing risk of HIV acquisition, be evaluated  
92 for possible PrEP use [13-16]. However, emerging evidence suggests that uptake of  
93 PrEP among gbMSM who have repeatedly used nPEP is suboptimal [17]. With the  
94 Fast-Track city goal of zero new HIV infections, it is crucial to limit these missed  
95 prevention opportunities. In 2013, Québec became the first Canadian province to  
96 recommend PrEP and fund it using public budgets. Using 6 years of longitudinal data on  
97 sexual health clinic attendees, the overarching aim of this study is to characterize the  
98 PEP-to-PrEP corridor and identify potential barriers to linkage. Specifically, we will: 1)  
99 describe longitudinal trends in nPEP and PrEP use, 2) estimate the time from nPEP to  
100 PrEP and the determinants of PrEP uptake by nPEP users, and 3) compare the  
101 differences in PrEP persistence between participants with and without a history of nPEP  
102 use. These results could help limit missed HIV prevention opportunities among gbMSM.

### 103 **Methods**

#### 104 **Study setting**

105 *Clinique médicale l'Actuel* (l'Actuel) is a Montréal-based, sexual health clinic  
106 specializing in HIV treatment and prevention, predominantly among gbMSM. The clinic  
107 is one of the largest nPEP and PrEP providers in Canada and was one of the first clinics  
108 to prescribe nPEP (August 2000) and PrEP (January 2013). Attendees at l'Actuel  
109 seeking nPEP and PrEP were recruited prospectively from August 2000 for the nPEP  
110 cohort and January 2013 for the PrEP cohort. At each nPEP and PrEP consultation,  
111 patients complete a questionnaire regarding their demographic and behavioural

## PREP UPTAKE AMONG NPEP USERS IN MONTRÉAL

112 characteristics and a consent form. The clinical component of the survey is  
113 administered by a nurse or physician. Participants consulting for nPEP were scheduled  
114 for follow-up visits with a clinician at 4 and 12 weeks following their initial nPEP  
115 prescription, which included HIV testing to monitor nPEP efficacy as well as sexual  
116 health and HIV prevention counselling, including PrEP referrals when appropriate. All  
117 participants consulting for PrEP were scheduled for a follow-up visit 30 days after the  
118 baseline consultation and at 3-month intervals thereafter. De-identified questionnaires  
119 were then entered into prospective nPEP and PrEP cohort databases. A detailed  
120 description of the cohorts and clinical protocols can be found elsewhere [18 19].

### 121 **Study population**

122 The study population included self-identified gbMSM who consulted for nPEP and/or  
123 PrEP at *Clinique médicale l'Actuel*. Participants who were HIV positive at their baseline  
124 visit were excluded from the study population. The first analysis assessed longitudinal  
125 trends in nPEP and PrEP consultations from October 2000 – August 2019.

126 We restricted the analysis to the time periods during which PrEP was recommended  
127 (January 1<sup>st</sup>, 2013 and August 31<sup>st</sup>, 2019) for the primary analysis measuring the  
128 determinants of PrEP uptake among nPEP users. Participants were categorized into 4  
129 groups: 1) those who consulted for or received nPEP only (hereafter referred to as *PEP*  
130 *only participants*), 2) those who consulted for or received PrEP only (hereafter referred  
131 to as *PrEP only participants*), 3) participants who consulted for or received nPEP prior  
132 to using PrEP at l'Actuel (hereafter referred to *PEP-to-PrEP participants*), and 4) PEP-  
133 naïve participants who initiated PrEP and subsequently consulted for nPEP after PrEP

## PREP UPTAKE AMONG NPEP USERS IN MONTRÉAL

134 discontinuation (hereafter referred to *PrEP-to-PEP participants*) (**Figure 1**). Our study  
135 design enables us to link participants in the nPEP and PrEP cohorts but not those who  
136 sought care at other clinics. As such, we could not properly estimate time to linkage,  
137 and the small number of participants who sought nPEP at l'Actuel but PrEP elsewhere  
138 (N=13) and PrEP at l'Actuel but nPEP from another clinic (N=120) were excluded from  
139 the analyses. Participants whose last nPEP consultation took place before 2013 were  
140 also excluded from the study regardless of whether they consulted for PrEP as PrEP  
141 was unavailable at that time.

### 142 **Analyses**

143 Longitudinal trends in nPEP and PrEP consultations from 2000-2019 are presented and  
144 the demographic and behavioral profiles of "*PEP only*", "*PrEP only*", and "*PEP-to-PrEP*"  
145 participants over the 2013-2019 period are compared. The variables examined include:  
146 age, education, total number of nPEP episodes, average time between nPEP episodes  
147 (for participants who had multiple nPEP episodes and nPEP visits before the first PrEP  
148 consultation), adherence to a nPEP treatment (missing <4 pills), early termination of  
149 nPEP treatment and whether the participant was re-exposed to HIV during nPEP  
150 treatment, chemsex (i.e., sexualized substance use), and a self-reported lifetime history  
151 of sexually transmitted infections [17].

152 The time from the first nPEP visit after 2013 to the first PrEP consultation, stratified by  
153 age group (<25, 25-49, ≥50 years, to ensure a large enough sample size in each group  
154 while allowing salient age features to be considered), by the total number of nPEP  
155 episodes and by the calendar year of the first nPEP visit was explored using Kaplan-



## PREP UPTAKE AMONG NPEP USERS IN MONTRÉAL

156 Meier curves. Determinants of the time to PrEP uptake among nPEP users were  
157 examined using a Cox proportional-hazards model. The model included covariates for  
158 which there was previous evidence of potential association [20] or an indication for  
159 PrEP [4], including: age and education (secondary and lower, college (including  
160 Quebec's *Collège d'enseignement général et professionnel* (CEGEP) program,  
161 university). Additionally, the total number of nPEP episodes, chemsex during the risk  
162 episode, self-reported lifetime STI history (any/none) and whether the participants  
163 returned for the first nPEP follow-up visit were included in the model and were treated  
164 as time-dependent covariates. The year of the first nPEP consult after 2013, was used  
165 to stratify the survival analyses. All cohort participants were censored if they  
166 seroconverted during follow-up, in August 2019, or at their first PrEP consult, whichever  
167 occurred first. Schoenfeld residuals were used to verify that the proportional hazard  
168 assumption was met for each predictor-outcome pair [21], while the Efron method was  
169 adopted to handle potential ties [22]. Missing values of education (N=325) and STI  
170 history (N=91) were handled using multiple imputations and estimates from 5  
171 imputations were pooled using Rubin's rules [23].

172 Lastly, a Kaplan-Meier analysis was used to characterise the differences in PrEP  
173 persistence between *PEP-to-PrEP* and *PrEP only* participants who initiated PrEP. PrEP  
174 termination was defined as a discontinuation of PrEP as indicated by the participant, or  
175 as no active PrEP prescription within the past 6 months after the participant's last PrEP  
176 follow-up visit. Participants who consulted for PrEP but who did not attend the first PrEP  
177 follow up visit were excluded from the analysis.

178 All analyses were performed with R version 3.6.1.

## PREP UPTAKE AMONG NPEP USERS IN MONTRÉAL

179 Ethics approval was obtained through Veritas Institutional Review Board and McGill  
180 University.

### 181 **Results**

#### 182 ***Description of the study participants***

##### 183 *Entire l'Actuel cohort*

184 Between October 2000 (for the nPEP cohort) or January 2013 (for the PrEP cohort) and  
185 August 2019, 5,512 attendees consulted for nPEP and 3,066 individuals consulted for  
186 PrEP at l'Actuel. A total of 6,039 nPEP consultations and 3,253 PrEP consultations took  
187 place at l'Actuel among 4,139 and 2,814 gbMSM, respectively. A steady increase in  
188 consultations was observed prior to 2016, followed by decreases in both the numbers of  
189 nPEP and PrEP consultations from 2017 onwards (**Figure 2**). The simultaneous  
190 reduction in nPEP and PrEP can be explained by the emergence of new clinics  
191 specializing in HIV that provide similar services.

192 From January 2013 onwards, of the 2,682 participants who received nPEP and who met  
193 the inclusion criteria (i.e., gbMSM, cis-male, consented participation), 36% (972/2,679)  
194 also consulted for or received PrEP during that period and only 1% (13/972) reported  
195 having had a PrEP consultation outside of l'Actuel. Nearly half of the 2,718 consenting  
196 gbMSM PrEP participants also used nPEP during that period (46%, 1,242/2,715), 10%  
197 of whom (120/1,242) received nPEP externally to l'Actuel. The majority of participants in  
198 both the nPEP and PrEP cohorts consulted for nPEP prior to PrEP (90%, 861/959).

## PREP UPTAKE AMONG NPEP USERS IN MONTRÉAL

199 Almost all *PEP-to-PrEP* participants were prescribed PrEP (98%, 847/861) and 17%  
200 (144/861) reinitiated nPEP afterwards (Figure 1).

### 201 *Participants included in the main analysis*

202 Overall, 1,707 *PEP only* participants, 861 *PEP-to-PrEP* participants and 1,473 *PrEP*  
203 *only* participants were included in the main analyses. More *PEP-to-PrEP* participants  
204 had a history of multiple nPEP episodes than *PEP only* participants. Furthermore, *PEP-*  
205 *to-PrEP* participants reported a 6-month shorter average time between nPEP episodes  
206 than *PEP only* participants. Approximately 44% (382/861) and 24% (414/1,707) of *PEP-*  
207 *to-PrEP* participants and *PEP only* participants had at least 2 nPEP episodes.

208 Additionally, the proportion of participants returning for the first nPEP follow-up visit and  
209 who were adherent to nPEP treatment was 19% and 12% higher among *PEP-to-PrEP*  
210 participants than *PEP only* participants. Compared to the other 2 groups, *PrEP only*  
211 participants had a lower education level and the proportion self-reporting a lifetime  
212 history of STIs was 10% higher (**Table 1**).

### 213 ***Time from nPEP consultation to PrEP uptake and its determinants***

214 During the study period, approximately 40% of the nPEP participants linked to PrEP.  
215 One quarter of the participants linked to PrEP within the first 20 months after first nPEP  
216 consultation. Participants younger than 25 years old had lower rates of PrEP linkage  
217 years and participants who had at least 2 nPEP episodes had overall higher rates of  
218 PrEP linkage. Participants with more nPEP episodes linked to PrEP at a higher rate.  
219 The rate of PrEP linkage increased over time between 2013 and 2019 (**Figure 3 A, B,**  
220 **C**).

## PREP UPTAKE AMONG NPEP USERS IN MONTRÉAL

221 Participants aged 25-49 years of age, who had multiple nPEP episodes, chemsex  
222 during the risk period, self-reported antecedent STIs, and returned for the first nPEP  
223 follow-up visit were the main determinants of time to PrEP linkage in the multivariate  
224 model (**Table 2**). The association between education and PrEP linkage was  
225 inconclusive although participants with a university degree had a slightly higher hazard  
226 ratio than those who finished college. Estimates of the total number of nPEP episodes  
227 suggested that each additional nPEP consultation would increase the rate of PrEP  
228 linkage among nPEP users by 39% (HR=1.39, CI: [1.31-1.46]). Chemsex during the risk  
229 period and having antecedent STIs increased the rate of PrEP linkage by 30%  
230 (HR=1.30, 95% CI: [1.08, 1.56]) and 46% (HR=1.46, 95% CI: [1.26, 1.69]), respectively.  
231 Returning for the first nPEP follow-up visit at week 4 was strongly associated with  
232 linkage to PrEP, increasing the rate of linkage to 3.36 (95% CI: [2.71, 4.16]) times the  
233 rate for those who did not return for the follow-up visit.

### 234 ***PrEP persistence among PEP-to-PrEP and PrEP only participants***

235 Daily PrEP was prescribed to 78% (674/861) of the *PEP-to-PrEP* participants and 82%  
236 (1,208/1,473) of the *PrEP only* participants while the remainder of the participants were  
237 prescribed intermittent PrEP. Following their PrEP consult, 78% of the *PEP-to-PrEP*  
238 participants and 76% of the *PrEP only* participants initiated PrEP. The probability of  
239 PrEP persistence was similar between *PEP-to-PrEP* and *PrEP only* participants (Figure  
240 3D). The median time to PrEP discontinuation was 0.59 (95% CI: [0.06, 3.44]) and 0.54  
241 years (95%CI: [0.06, 2.96]) among *PEP-to-PrEP* and *PrEP only* participants,  
242 respectively. Half of the participants discontinued PrEP within the first year of initiation.

## PREP UPTAKE AMONG NPEP USERS IN MONTRÉAL

### 243 **Discussion**

244 PrEP is a highly effective biomedical HIV prevention method recommended for high-risk  
245 populations, such as gbMSM, and is an important component of combination prevention  
246 strategies to achieve HIV elimination [4 6 12]. In our analysis of six years of longitudinal  
247 data from the l'Actuel nPEP and PrEP cohorts, approximately 40% of nPEP users were  
248 linked to PrEP, of which one quarter of the linkages occurred within the first 20 months  
249 after nPEP consultation. nPEP participants aged 25-49 years, who reported multiple  
250 nPEP episodes, chemsex, antecedent STIs, and who returned for the first nPEP follow-  
251 up visit were more likely to link to PrEP. Reporting a history of nPEP use did not impact  
252 PrEP persistence.

253 Our evaluation suggests that the time from nPEP consult to PrEP linkage rapidly  
254 improved over the 2013-2019 period. This was particularly evident after 2015 when  
255 more than 20% of individuals consulted for PrEP within the first year of their nPEP  
256 consult. A study conducted in Toronto by Siemieniuk *et al.* (2005) indicated that 10% of  
257 the individuals who consulted for nPEP at the *HIV Prevention Clinic* between 2013 and  
258 2014 initiated PrEP as of 2015 [24]. This proportion is much lower than what was found  
259 here- but could be explained by the lack of a publicly funded PrEP program in Ontario at  
260 the time.

261 Despite improvements in PEP-to-PrEP linkage at l'Actuel, such progress could be  
262 compromised by the overall low persistence on PrEP. Indeed, half of the PrEP users  
263 discontinued it during the first year. There are multiple reasons for the observed PrEP  
264 discontinuation including: changes in sexual behaviors, such as increased condom use,

## PREP UPTAKE AMONG NPEP USERS IN MONTRÉAL

265 and the formation of a single long-term partnership [25 26]. However, the  
266 discontinuations could be concerning if they are not related to change in sexual  
267 behaviors. There is some evidence to suggest that this is not always the case. For  
268 example, 98 (7%) PrEP users, and 144 (17%) *PEP-to-PrEP* users sought nPEP after  
269 PrEP discontinuation. If this group is composed of individuals with a low-frequency of  
270 high-risk exposures, other interventions such as PIP (post-exposure prophylaxis in  
271 pocket) should be considered [27]. This could be important for PEP-experienced users.  
272 A recent study in Toronto recorded a high prevalence of syndemic health problems  
273 among MSM seeking nPEP [28]. This clustering of syndemic conditions could partly  
274 explain low persistence on PrEP of nPEP users, which was also observed in other  
275 cohorts [29].

276 Our results should be interpreted considering several limitations. First, we cannot rule  
277 out that participants who used nPEP at l'Actuel eventually consulted for PrEP at other  
278 clinics. As such, we may have overestimated time to linkage. Despite this limitation, only  
279 1% of participants in the nPEP cohort reported having taken PrEP outside of l'Actuel.  
280 Further, only 10% of the PrEP cohort had consulted for nPEP at another clinic. This  
281 could imply that our inability to link our nPEP and PrEP cohorts to other clinics may  
282 have only small impacts our inferences. However, given the changing HIV prevention  
283 landscape in Montreal after 2017, future work should include multi-sites collaboration.  
284 Second, it is difficult to know the exact date of PrEP termination for participants who did  
285 not return for a follow-up visit which may result in incorrectly estimating the participants'  
286 adherence to a PrEP regimen. The date of last PrEP consultation was used as the end  
287 date of PrEP for those who discontinued PrEP, which might underestimate the time on

## PREP UPTAKE AMONG NPEP USERS IN MONTRÉAL

288 PrEP. Additionally, participants on an intermittent PrEP regime may have sufficient pills  
289 to last for more than 6 months, prolonging the time between follow-up visits, which  
290 would be treated as “terminated PrEP” in this study and lower the estimated PrEP  
291 persistence. However, as the PrEP persistence analysis performed in this study was  
292 aimed to observe the difference between PrEP users with and without a nPEP history,  
293 this could have minimal impact on our results. Third, and not unlike other studies, we  
294 relied on self-reported information regarding potentially sensitive behaviors (e.g.,  
295 antecedent STI, sexual behaviors, sexualized substance use) that could have been  
296 misreported. Finally, the number of missing values for certain covariates was non-  
297 negligible. However, multiple imputation was used which efficiently propagated  
298 uncertainty to the relevant effect size measures.

299 As one of the largest nPEP and PrEP providers in Canada, the data collected at  
300 *Clinique médicale l’Actuel* provides a comprehensive data set characterising the trends  
301 in nPEP and PrEP use among gbMSM in Montréal. The large sample size of this study  
302 enabled us to conduct subgroup analyses. Additionally, the study period covered the  
303 time from the beginning of PrEP implementation in Québec until the present which  
304 made it possible to capture a complete picture of PrEP use development and the impact  
305 of PrEP on nPEP use. These strengths have resulted in a robust quantification of the  
306 relationship between nPEP and PrEP use among gbMSM in this Canadian setting.

### 307 **Conclusions**

308 Making PrEP accessible, and promoting its use, to high risk populations is essential to  
309 prevent HIV transmission. Understanding the current gaps and the determinants of

## PREP UPTAKE AMONG NPEP USERS IN MONTRÉAL

310 PEP-to-PrEP linkages could help optimize PrEP delivery. Our results suggest that  
311 creating a strong linkage corridor between nPEP and PrEP services could help facilitate  
312 PrEP uptake among gbMSM vulnerable to HIV acquisition. Furthermore, given that 17%  
313 *PEP-to-PrEP* users sought nPEP after PrEP discontinuation, future interventions should  
314 focus on increasing PrEP continuation among people at on-going HIV risk. These  
315 results should be used to better inform individualized HIV prevention strategies if  
316 Montréal's Fast-Track city goal of HIV elimination is to be achieved, contributing to the  
317 global effort to eliminate HIV/AIDS by 2030 [30].

318



## PREP UPTAKE AMONG NPEP USERS IN MONTRÉAL

### 319 **References**

- 320 1. PHAC. Summary: Estimates of HIV Incidence, Prevalence and Canada's Progress on Meeting  
321 the 90-90-90 HIV Targets, 2016, 2018.
- 322 2. UNAIDS. Global HIV & AIDS statistics - 2018 fact sheet, 2018.
- 323 3. Montréal S. Fast-Track City - A Common Action Plan to Accelerate the Fight Against the  
324 HIV/AIDS Epidemic. Secondary Fast-Track City - A Common Action Plan to Accelerate the  
325 Fight Against the HIV/AIDS Epidemic 2017.  
326 [https://santemontreal.qc.ca/en/public/news/news/fast-track-city-a-common-action-](https://santemontreal.qc.ca/en/public/news/news/fast-track-city-a-common-action-plan-to-accelerate-the-fight-against-the-hiv-aids-epidemic/)  
327 [plan-to-accelerate-the-fight-against-the-hiv-aids-epidemic/](https://santemontreal.qc.ca/en/public/news/news/fast-track-city-a-common-action-plan-to-accelerate-the-fight-against-the-hiv-aids-epidemic/).
- 328 4. Tan DHS, Hull MW, Yoong D, et al. Canadian guideline on HIV pre-exposure prophylaxis and  
329 nonoccupational postexposure prophylaxis. CMAJ 2017;**189**(47):E1448-E58 doi:  
330 10.1503/cmaj.170494[published Online First: Epub Date] | .
- 331 5. WHO. Post-exposure Prophylaxis to Prevent HIV Infection. 2007
- 332 6. WHO. Guidance on Pre-exposure Oral Prophylaxis (PrEP) for Serodiscordant Couples, Men  
333 and Transgender Women Who Have Sex With Men at High Risk of HIV, 2012.
- 334 7. Molina JM, Capitant C, Spire B, et al. On-Demand Preexposure Prophylaxis in Men at High  
335 Risk for HIV-1 Infection. New Engl J Med 2015;**373**(23):2237-46 doi:  
336 10.1056/NEJMoa1506273[published Online First: Epub Date] | .
- 337 8. Molina JM, Charreau I, Spire B, et al. Efficacy, safety, and effect on sexual behaviour of on-  
338 demand pre-exposure prophylaxis for HIV in men who have sex with men: an  
339 observational cohort study. Lancet Hiv 2017;**4**(9):E402-E10 doi: 10.1016/S2352-  
340 3018(17)30089-9[published Online First: Epub Date] | .

## PREP UPTAKE AMONG NPEP USERS IN MONTRÉAL

- 341 9. Huang XJ, Hou JH, Song AX, et al. Efficacy and Safety of Oral TDF-Based Pre-exposure  
342 Prophylaxis for Men Who Have Sex With Men: A Systematic Review and Meta-Analysis.  
343 Front Pharmacol 2018;**9** doi: ARTN 79910.3389/fphar.2018.00799[published Online First:  
344 Epub Date]].
- 345 10. Grant RM, Lama JR, Anderson PL, et al. Preexposure Chemoprophylaxis for HIV Prevention  
346 in Men Who Have Sex with Men. New Engl J Med 2010;**363**(27):2587-99 doi:  
347 10.1056/NEJMoa1011205[published Online First: Epub Date]].
- 348 11. Grohskopf LA, Chillag KL, Gvetadze R, et al. Randomized Trial of Clinical Safety of Daily Oral  
349 Tenofovir Disoproxil Fumarate Among HIV-Uninfected Men Who Have Sex With Men in  
350 the United States. J Aids-J Acq Imm Def 2013;**64**(1):79-86 doi: DOI  
351 10.1097/QAI.0b013e31828ece33[published Online First: Epub Date]].
- 352 12. CDC. PrEP Brochure. Secondary PrEP Brochure. <https://www.cdc.gov/hiv/basics/prep.html>.
- 353 13. CDC US. PEP 101 Consumer Info Sheet, 2019.
- 354 14. CDC USPHS. Preexposure prophylaxis for the prevention of HIV infection in the United  
355 States - 2017 Update, 2017.
- 356 15. Roland ME, Neilands TB, Krone MR, et al. A Randomized Noninferiority Trial of Standard  
357 Versus Enhanced Risk Reduction and Adherence Counseling for Individuals Receiving  
358 Post-Exposure Prophylaxis Following Sexual Exposures to HIV. Clin Infect Dis  
359 2011;**53**(1):76-83 doi: 10.1093/cid/cir333[published Online First: Epub Date]].
- 360 16. Whitlock G, McCormack C, Fearnley J, McOwan A. High HIV incidence in men who have sex  
361 with men attending for postexposure prophylaxis: a service evaluation. Sex Transm

## PREP UPTAKE AMONG NPEP USERS IN MONTRÉAL

- 362 Infect 2017;**93**(3) doi: 10.1136/sextrans-2016-052623[published Online First: Epub  
363 Date] |.
- 364 17. Pathela P, Jamison K, Braunstein S, et al. HIV incidence, and pre- and post-exposure  
365 prophylaxis (PrEP and PEP) among PEP users at New York city sexual health clinics. Sex  
366 Transmitted Infections 2019;**95**:A203
- 367 18. Thomas R, Galanakis C, Vezina S, et al. Adherence to Post-Exposure Prophylaxis (PEP) and  
368 Incidence of HIV Seroconversion in a Major North American Cohort. Plos One  
369 2015;**10**(11) doi: ARTN e014253410.1371/journal.pone.0142534[published Online First:  
370 Epub Date] |.
- 371 19. Greenwald ZR, Maheu-Giroux M, Szabo J, et al. Cohort profile: l'Actuel Pre-Exposure  
372 Prophylaxis (PrEP) Cohort study in Montreal, Canada. BMJ Open 2019;**9**(6):e028768 doi:  
373 10.1136/bmjopen-2018-028768[published Online First: Epub Date] |.
- 374 20. Greenwald ZR, Beauchemin M, Corsenac P, et al. PrEP initiation following PEP: Creating a  
375 Corridor of Care at l'Actuel. CAHR, 2018:51.
- 376 21. Moore DF. <https://doi.org/10.1007/978-3-319-31245-3>: Springer, Cham.
- 377 22. Dohoo I, Martin W, Stryhn H. Veterinary epidemiologic research. Charlottetown, P.E.I.:  
378 University of Prince Edward Island, 2003.
- 379 23. Buuren SV, Groothuis-Oudshoorn K. mice: Multivariate Imputation by Chained Equations in  
380 R. Journal of Statistical Software Dec 2011;**45**(3)
- 381 24. Smith DK, Grohskopf LA, Black RJ, et al. Antiretroviral postexposure prophylaxis after sexual,  
382 injection-drug use, or other nonoccupational exposure to HIV in the United States:

## PREP UPTAKE AMONG NPEP USERS IN MONTRÉAL

- 383 recommendations from the U.S. Department of Health and Human Services. MMWR  
384 Recomm Rep 2005;**54**(RR-2):1-20
- 385 25. Naismith K JT. Washington PrEP DAP Client Survey Key Findings, 2017: Washington State  
386 Department of Health Office of Infectious Disease, August 1, 2018.
- 387 26. Hojilla JC, Vlahov D, Crouch PC, Dawson-Rose C, Freeborn K, Carrico A. HIV Pre-exposure  
388 Prophylaxis (PrEP) Uptake and Retention Among Men Who Have Sex with Men in a  
389 Community-Based Sexual Health Clinic. Aids Behav 2018;**22**(4):1096-99 doi:  
390 10.1007/s10461-017-2009-x[published Online First: Epub Date] |.
- 391 27. Wood BR. Prevention of HIV for persons with low-frequency, high-risk exposures: PrEP  
392 (preexposure prophylaxis), PEP (postexposure prophylaxis), or 'PIP' (postexposure  
393 prophylaxis in-pocket). AIDS 2020;**34**(3):481-82 doi:  
394 10.1097/QAD.0000000000002446[published Online First: Epub Date] |.
- 395 28. Morrison SA, Yoong D, Hart TA, et al. High prevalence of syndemic health problems in  
396 patients seeking post-exposure prophylaxis for sexual exposures to HIV. Plos One  
397 2018;**13**(5):e0197998 doi: 10.1371/journal.pone.0197998[published Online First: Epub  
398 Date] |.
- 399 29. Zucker J, Carnevale C, Richards P, et al. Predictors of Disengagement in Care for Individuals  
400 Receiving Pre-exposure Prophylaxis (PrEP). J Acquir Immune Defic Syndr  
401 2019;**81**(4):e104-e08 doi: 10.1097/QAI.0000000000002054[published Online First: Epub  
402 Date] |.
- 403 30. UNAIDS. Fast-track: ending the AIDS epidemic by 2030. Geneva, Switzerland: UNAIDS, 2014.  
404

## PREP UPTAKE AMONG NPEP USERS IN MONTRÉAL

### 405 **Figure captions**

406 **Figure 1** Inclusion and classification of study participants among attendees at the  
407 *Clinique médicale l'Actuel*, Montréal, Canada (October 2000 (PEP) / January 2013  
408 (PrEP) to August 2019). Gay, bisexual, and other men who have sex with men (gbMSM)  
409 participants who only consulted for or received non-occupational post-exposure  
410 prophylaxis (PEP) or pre-exposure prophylaxis (PrEP) were defined as “*PEP only*” and  
411 “*PrEP only*”, respectively. Participants who consulted for or received PrEP subsequently  
412 to consulting for nPEP were classified as “*PEP-to-PrEP*”. Participants who consulted for  
413 or received nPEP after PrEP were defined as “*PrEP-to-PEP*”. Objective 1 includes all  
414 participants, Objective 2 (red box) includes *PEP only* and *PEP-to-PrEP* participants, and  
415 Objective 3 (green box) includes *PrEP only* and *PEP-to-PrEP* participants.

416 **Figure 2** Number of post-exposure prophylaxis (PEP) and pre-exposure prophylaxis  
417 (PrEP) consultations conducted among gay, bisexual and other men who have sex with  
418 men (gbMSM) between January 2001 and August 2019 at *Clinique médicale l'Actuel*,  
419 Québec (QC), Canada. Each bar represents total number of nPEP consultations during  
420 a calendar year with the exception of the last bar which represents an eight-month  
421 period. The dashed line represents the total number of PrEP consultations over each  
422 time interval between July 2013 and August 2019. nPEP consultations before 2013 are  
423 greyed-out to indicate that they occurred before PrEP guidelines came into effect (these  
424 were also excluded from subsequent analyses).

425 **Figure 3** Survival curves of: (1) The cumulative proportion and 95% confidence  
426 intervals for consulting for pre-exposure prophylaxis (PrEP) after a post-exposure

## PREP UPTAKE AMONG NPEP USERS IN MONTRÉAL

427 prophylaxis (PEP) consultation stratified by age group (<25, 25-49, and  $\geq$  50 years)  
428 (Panel A), stratified by number of nPEP episodes (1 episode, 2 episodes, and  $\geq$ 3  
429 episodes) (Panel B), and stratified by calendar year of first nPEP consultation (Panel C),  
430 and (2) the proportion of participants who were persistent with pre-exposure prophylaxis  
431 (PrEP) stratified by post-exposure prophylaxis (PEP) history (Panel D) at Clinique  
432 médicale l'Actuel among gay, bisexual and other men who have sex with men (gbMSM).  
433 The x-axis represents the time since first nPEP consultation (Panels A, B, C) or time  
434 since first PrEP consultation (Panel D) after 2013 at *Clinique médicale l'Actuel*. PEP-to-  
435 PrEP: participants who previously consulted for nPEP and initiated PrEP at *Clinique*  
436 *médicale l'Actuel*. PrEP only: participants who self-reported never having consulted for  
437 nPEP (anywhere) but initiated PrEP at *Clinique médicale l'Actuel*.

438

**Table 1** Demographic and sexual behaviour characteristics of gay, bisexual, and other men who have sex with men (gbMSM) attending *Clinique médicale l'Actuel* at first nPEP consultation or PrEP consultation after 2013 for nPEP *only*, PEP-to-PrEP, and PrEP *only* participants.

| N (%)                                                                                                      | PEP only<br>(N=1,707) | PEP-to-PrEP<br>(N=861) | PrEP only<br>(N=1,473) |
|------------------------------------------------------------------------------------------------------------|-----------------------|------------------------|------------------------|
| <b>Age (mean, SD)</b>                                                                                      | 34 (11)               | 35 (10)                | 37 (11)                |
| <b>Education</b>                                                                                           |                       |                        |                        |
| Secondary and lower                                                                                        | 223 (13%)             | 91 (11%)               | 204 (14%)              |
| College                                                                                                    | 358 (21%)             | 151 (18%)              | 260 (18 %)             |
| University                                                                                                 | 924 (54%)             | 504 (59%)              | 694 (47%)              |
| Missing                                                                                                    | 202 (12%)             | 115 (13%)              | 315 (21%)              |
| <b>Total number of nPEP episodes<br/>(Oct. 2000 to Aug. 2019)<sup>1</sup></b>                              |                       |                        |                        |
| 1 episode                                                                                                  | 1293 (75%)            | 479 (56%)              |                        |
| 2 episodes                                                                                                 | 258 (15%)             | 192 (22%)              |                        |
| ≥ 3 episodes                                                                                               | 156 (9%)              | 190 (22%)              |                        |
| <b>Average time between nPEP episodes<br/>(months) (mean, SD)<sup>1</sup><br/>(Oct. 2000 to Aug. 2019)</b> |                       |                        |                        |
|                                                                                                            | 30 (28)               | 24 (21)                |                        |
| <b>Chemsex during the risk period related to<br/>the consultation</b>                                      |                       |                        |                        |
|                                                                                                            | 233 (14%)             | 139 (16%)              |                        |
| <b>Participated in chemsex in past 12<br/>months</b>                                                       |                       |                        |                        |
|                                                                                                            |                       |                        | 999 (76%)              |
| <b>Lifetime history of STIs (self-reported)</b>                                                            |                       |                        |                        |
|                                                                                                            | 885 (52%)             | 488 (57%)              | 974 (66%)              |
| Missing                                                                                                    | 51 (3%)               | 51 (6%)                | 123 (8%)               |
| <b>Returned for the first follow-up<sup>2</sup></b>                                                        |                       |                        |                        |
|                                                                                                            | 950 (68%)             | 644 (87%)              | 1113 (76%)             |
| <b>Adherence to nPEP treatment (missing &lt;4<br/>pills)<sup>2</sup></b>                                   |                       |                        |                        |
|                                                                                                            | 880 (63%)             | 557 (75%)              | /                      |
| Missing                                                                                                    | 483 (34%)             | 168 (22%)              | /                      |
| <b>Early termination of nPEP treatment<sup>2</sup></b>                                                     |                       |                        |                        |
|                                                                                                            | 33 (2%)               | 11 (1%)                | /                      |
| Missing                                                                                                    | 461 (33%)             | 144 (19%)              | /                      |
| <b>Re-exposure to HIV during nPEP<br/>treatment<sup>2</sup></b>                                            |                       |                        |                        |
|                                                                                                            | 12 (< 1%)             | 11 (1%)                | /                      |

<sup>1</sup> These two variables represent the nPEP *only* participants' entire nPEP history and the PEP-to-PrEP participants' nPEP history before their first PrEP consultation at l'Actuel.

<sup>2</sup> 303 nPEP *only* participants and 114 PEP-to-PrEP participants did not initiate nPEP and were thus excluded from the analysis.

<sup>3</sup> First follow-up: 4 weeks after the first nPEP consultation or 30 days after first PrEP consultation.

<sup>4</sup> Abbreviations: (1) PEP: post-exposure prophylaxis; (2) PrEP: pre-exposure prophylaxis; (3) STI: sexually transmitted infection.

**Table 2.** Univariable and multivariable hazard ratios and 95% confidence interval (95%CI) from Cox proportional hazard models of the determinants of time to PrEP consultation among gay, bisexual, and other men who have sex with men (gbMSM) who used nPEP after January 2013 at the *Clinique médicale l'Actuel*.

| Determinants                                                       | Univariate analysis<br>(N=2,571) |              | Multivariate analysis<br>(N=2,571) |              |
|--------------------------------------------------------------------|----------------------------------|--------------|------------------------------------|--------------|
|                                                                    | Hazard ratio                     | 95%CI        | Hazard ratio                       | 95%CI        |
| <b>Age (years)</b>                                                 |                                  |              |                                    |              |
| < 25                                                               | REF                              |              | REF                                |              |
| 25 - 49                                                            | 1.61                             | [1.31, 1.98] | 1.33                               | [1.08, 1.65] |
| ≥ 50                                                               | 1.47                             | [1.11, 1.95] | 1.08                               | [0.81, 1.44] |
| <b>Education<sup>1</sup></b>                                       |                                  |              |                                    |              |
| Secondary                                                          | REF                              |              | REF                                |              |
| College                                                            | 1.01                             | [0.77, 1.31] | 0.96                               | [0.73, 1.27] |
| University                                                         | 1.24                             | [0.98, 1.56] | 1.04                               | [0.82, 1.32] |
| <b>Total number of nPEP episodes</b>                               | 1.34                             | [1.25, 1.44] | 1.39                               | [1.31, 1.46] |
| <b>Chemsex during the risk period related to PEP consultations</b> | 1.23                             | [1.02, 1.49] | 1.30                               | [1.08, 1.56] |
| <b>Self-reported lifetime STI history<sup>1</sup></b>              | 1.54                             | [1.34, 1.77] | 1.46                               | [1.26, 1.69] |
| <b>Return for the first nPEP follow-up visit<sup>1</sup></b>       | 3.09                             | [2.49, 3.83] | 3.36                               | [2.71, 4.16] |

<sup>1</sup> Due to missing values, education, self-reported lifetime STI history and return for the first follow-up visit were imputed using 5 multiple imputations. Pooled estimates based on Rubin's rules are shown in the table.

<sup>2</sup> Abbreviations: (1) PEP: post-exposure prophylaxis; (2) STI: sexually transmitted infection.



# Objective 1

Attendees who sought PEP (N = 5512)

- Cis-male (92%)
- Cis-female (8%)
- Trans-gender (1%)

Attendees who sought PrEP (N = 3066)

- Cis-male (98%)
- Cis-female (1%)
- Trans-gender (<1%)

No consent (N=350)

Not gbMSM (N=1062)

Last consultation before  
January 1<sup>st</sup>, 2013 (N=1403)

First consultation after  
August 31<sup>st</sup>, 2019 (N=3)

HIV positive at first  
consultation after 2013  
(N=12)

No consent (N=251)

Not gbMSM (N=69)

First consultation before  
January 1<sup>st</sup>, 2013 (N=7)

First consultation after  
August 31<sup>st</sup>, 2019 (N=24)

PEP at l'Actuel but PrEP  
at another site (N=13)

PrEP at l'Actuel but PEP  
at another site (N=120)

PEP and PrEP at l'Actuel  
but last PEP before 2013  
(N=163)

Both PEP and PrEP at l'Actuel  
(N=959)

PrEP-to-PEP at l'Actuel  
(N=98)

PEP only  
(N=1707)

PEP-to-PrEP at l'Actuel (N=861)

- No PEP after PrEP (83%)
- PEP after PrEP (17%)

PrEP only  
(N=1473)

## Objective 2

## Objective 3

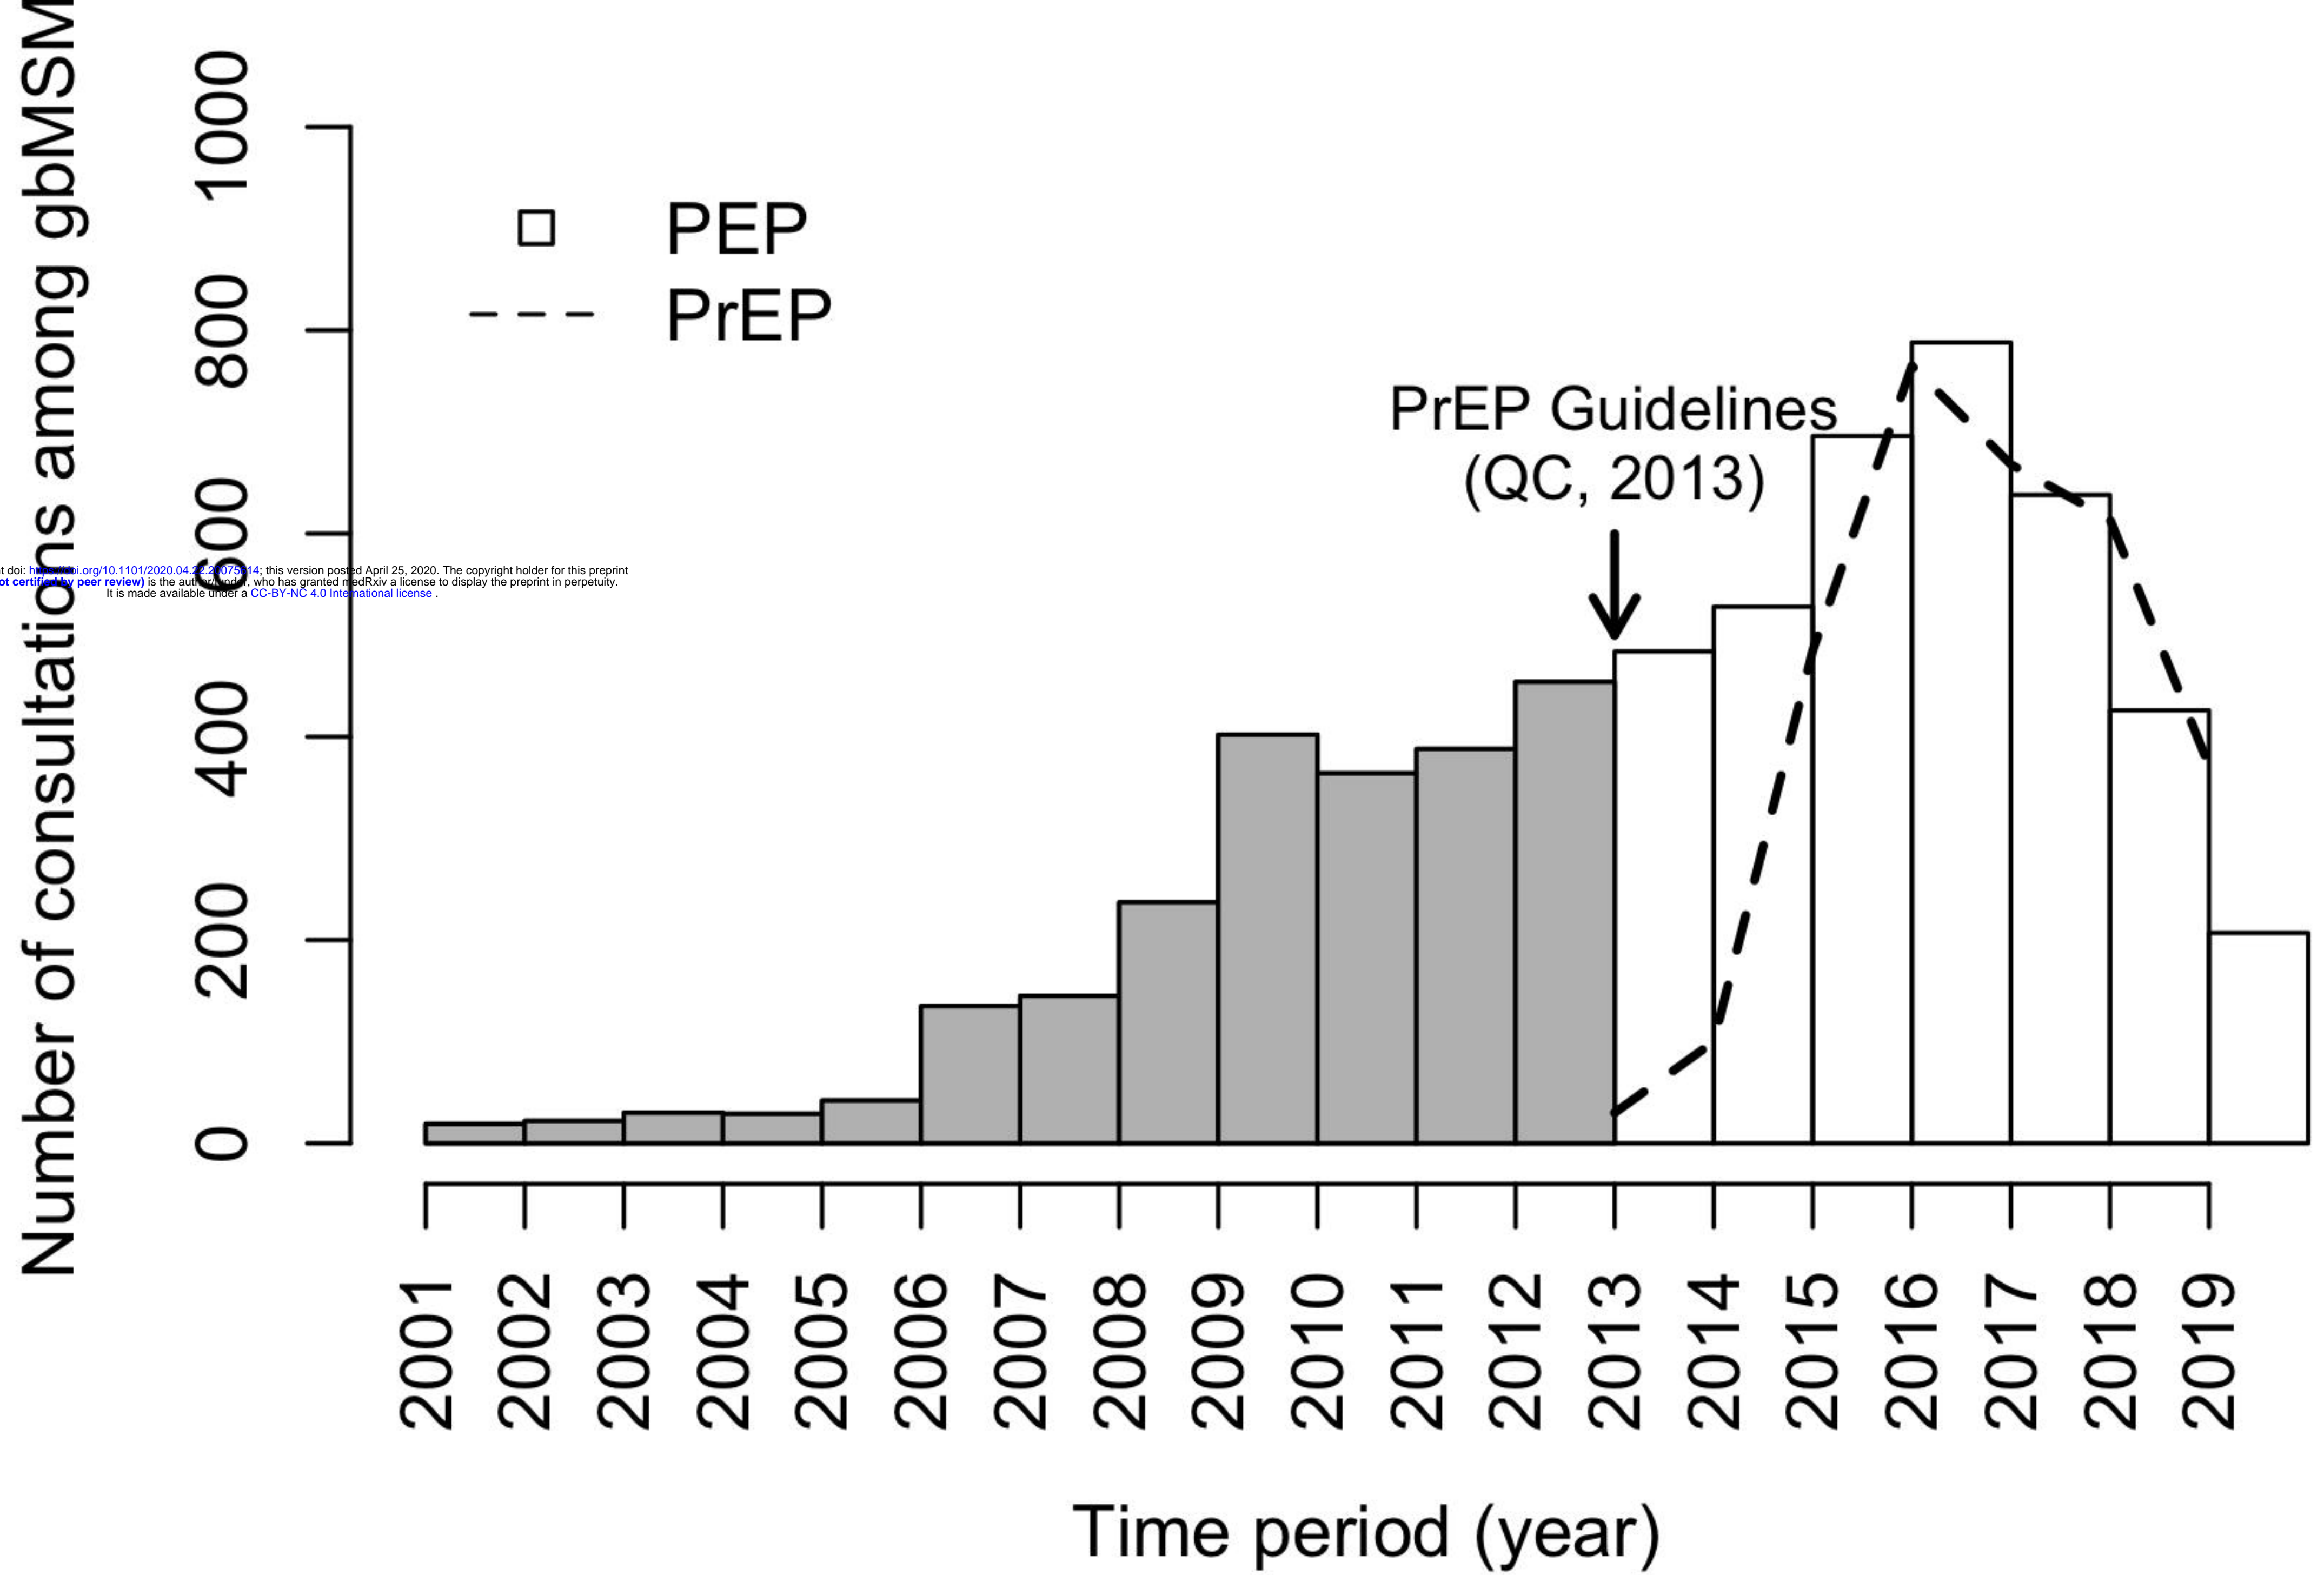

Cumulative proportion of PrEP linkage

medRxiv preprint doi: <https://doi.org/10.1101/2020.04.22.20075614>; this version posted April 25, 2020. The copyright holder for this preprint (which was not certified by peer review) is the author/funder, who has granted medRxiv a license to display the preprint in perpetuity. It is made available under a CC-BY-NC 4.0 International license.

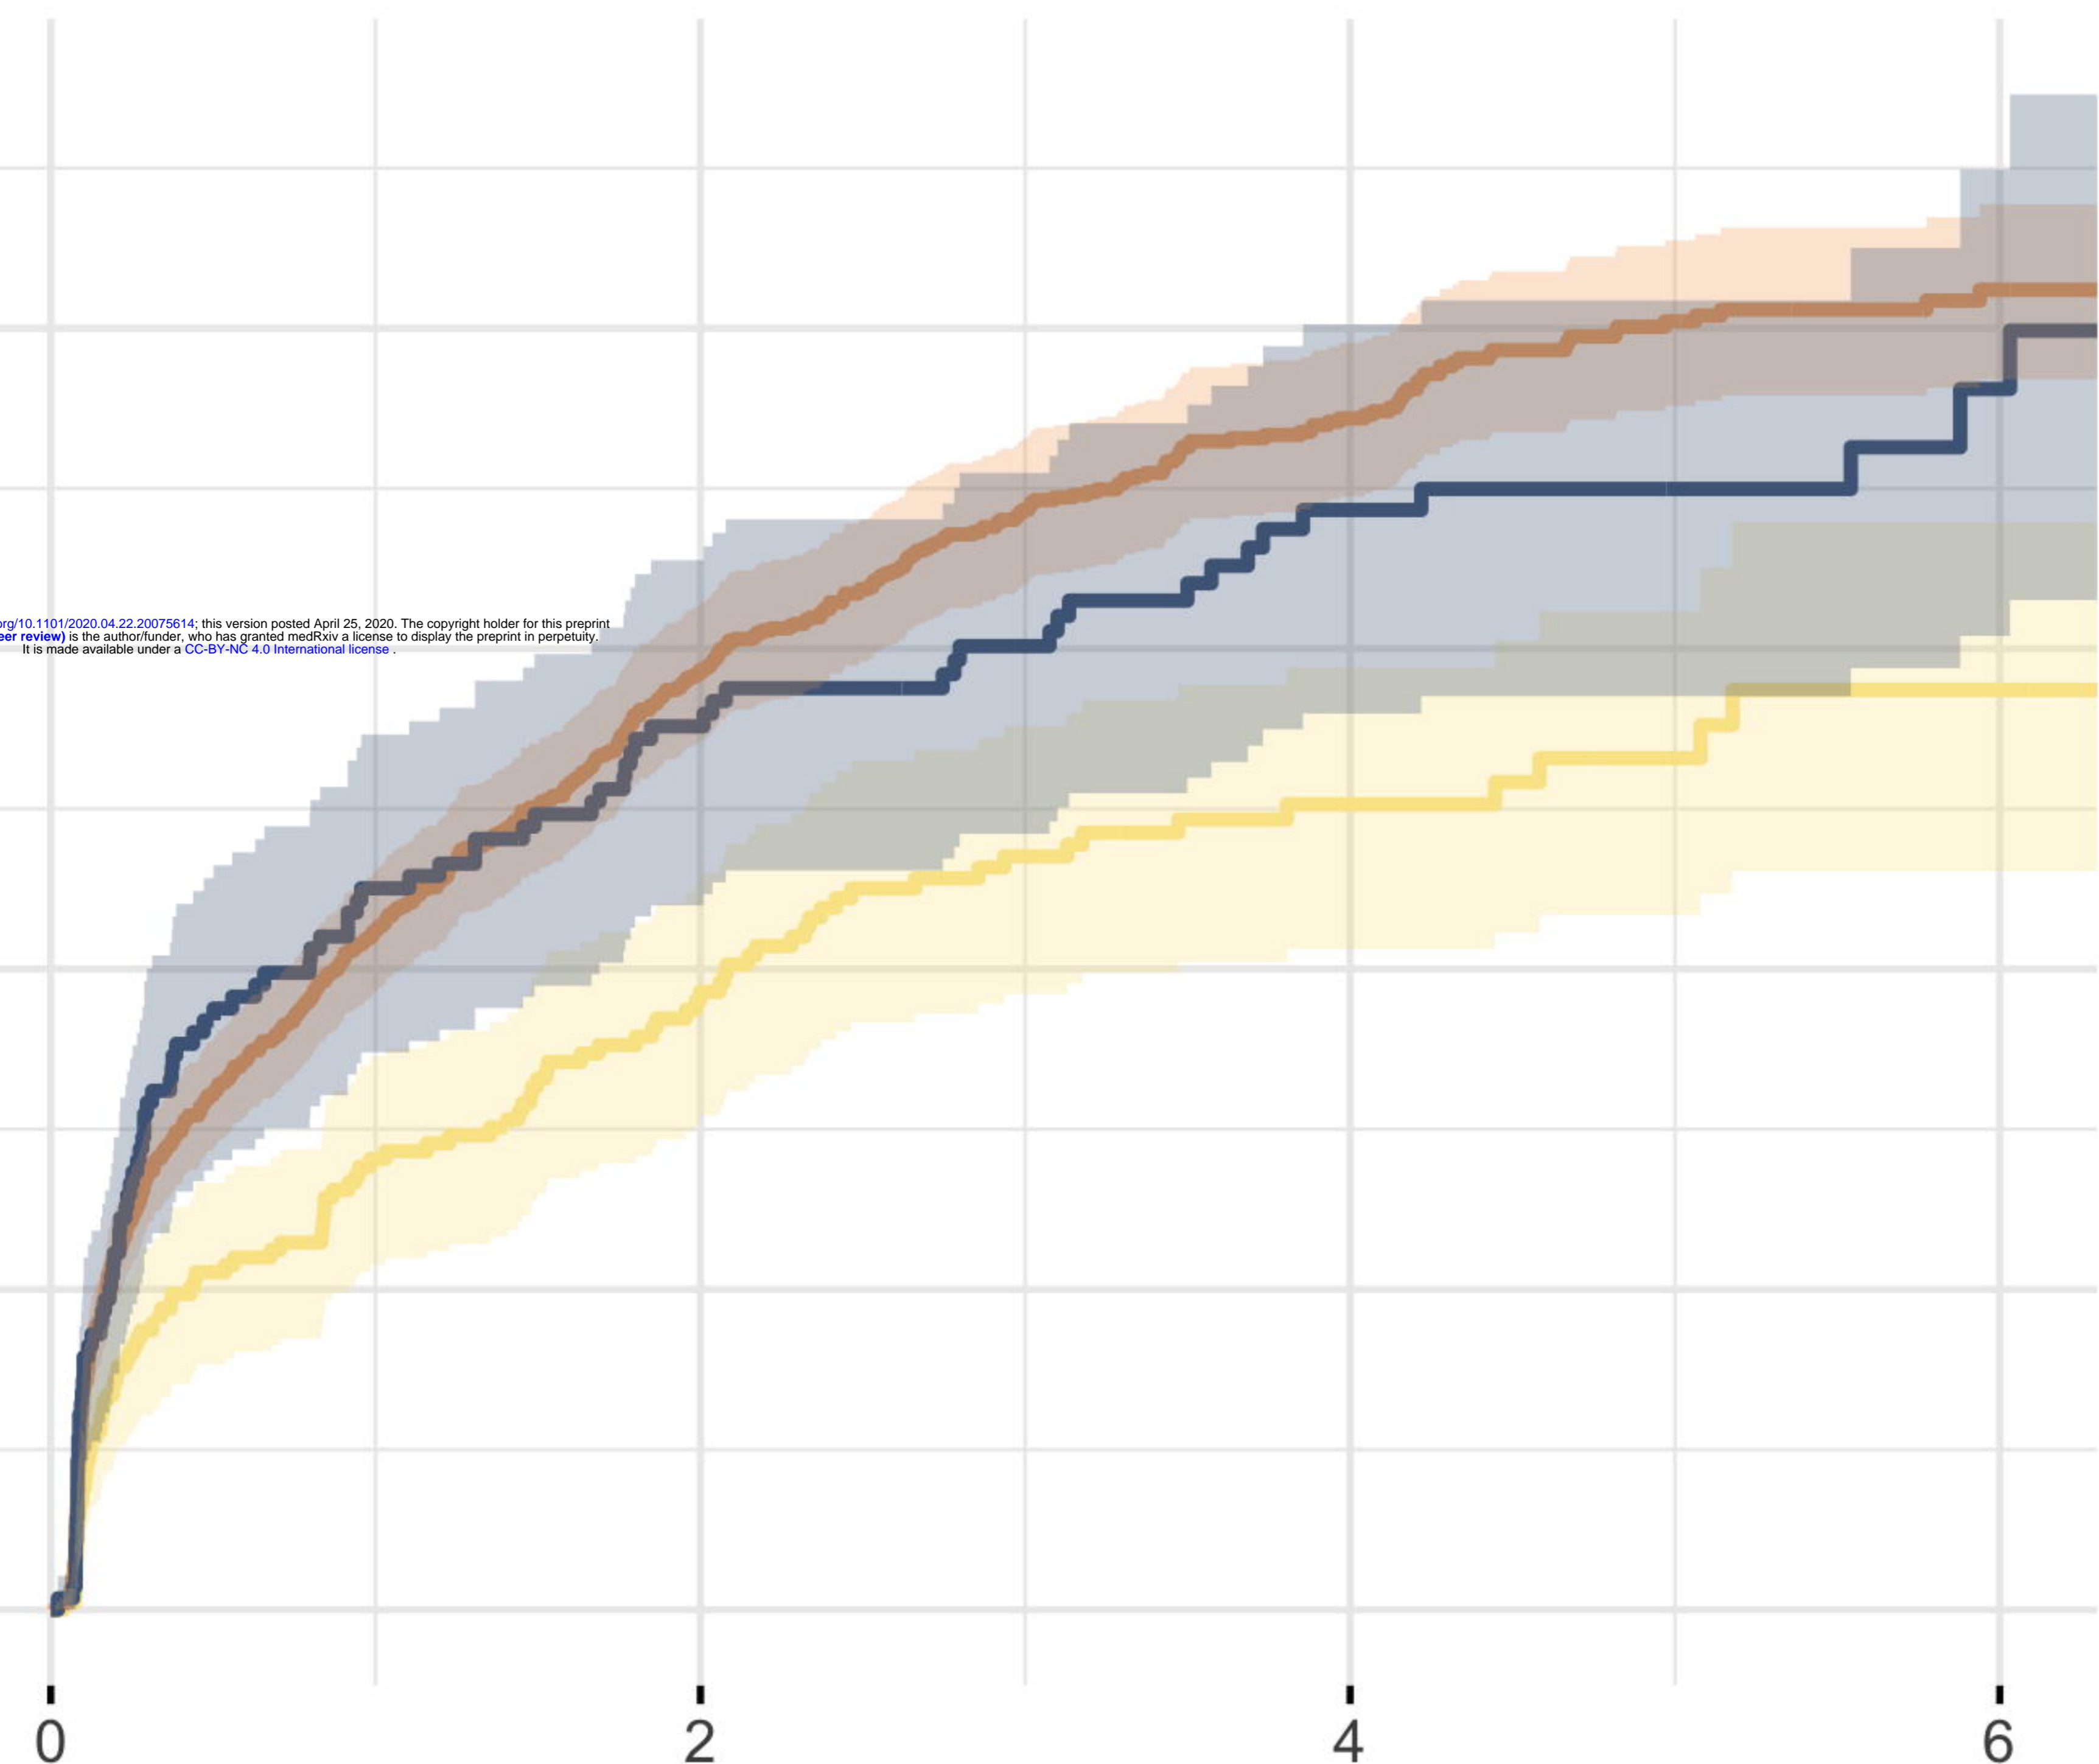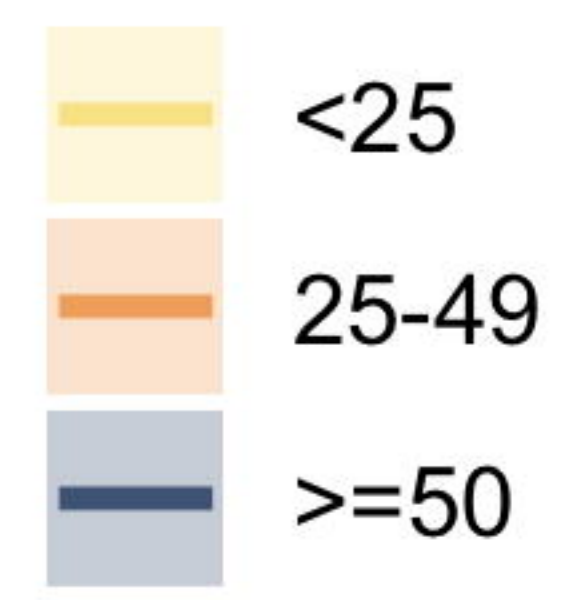

Time since first PEP consultation (years)

Cumulative proportion of PrEP linkage

medRxiv preprint doi: <https://doi.org/10.1101/2020.04.22.20075614>; this version posted April 25, 2020. The copyright holder for this preprint (which was not certified by peer review) is the author/funder, who has granted medRxiv a license to display the preprint in perpetuity. It is made available under a CC-BY-NC 4.0 International license.

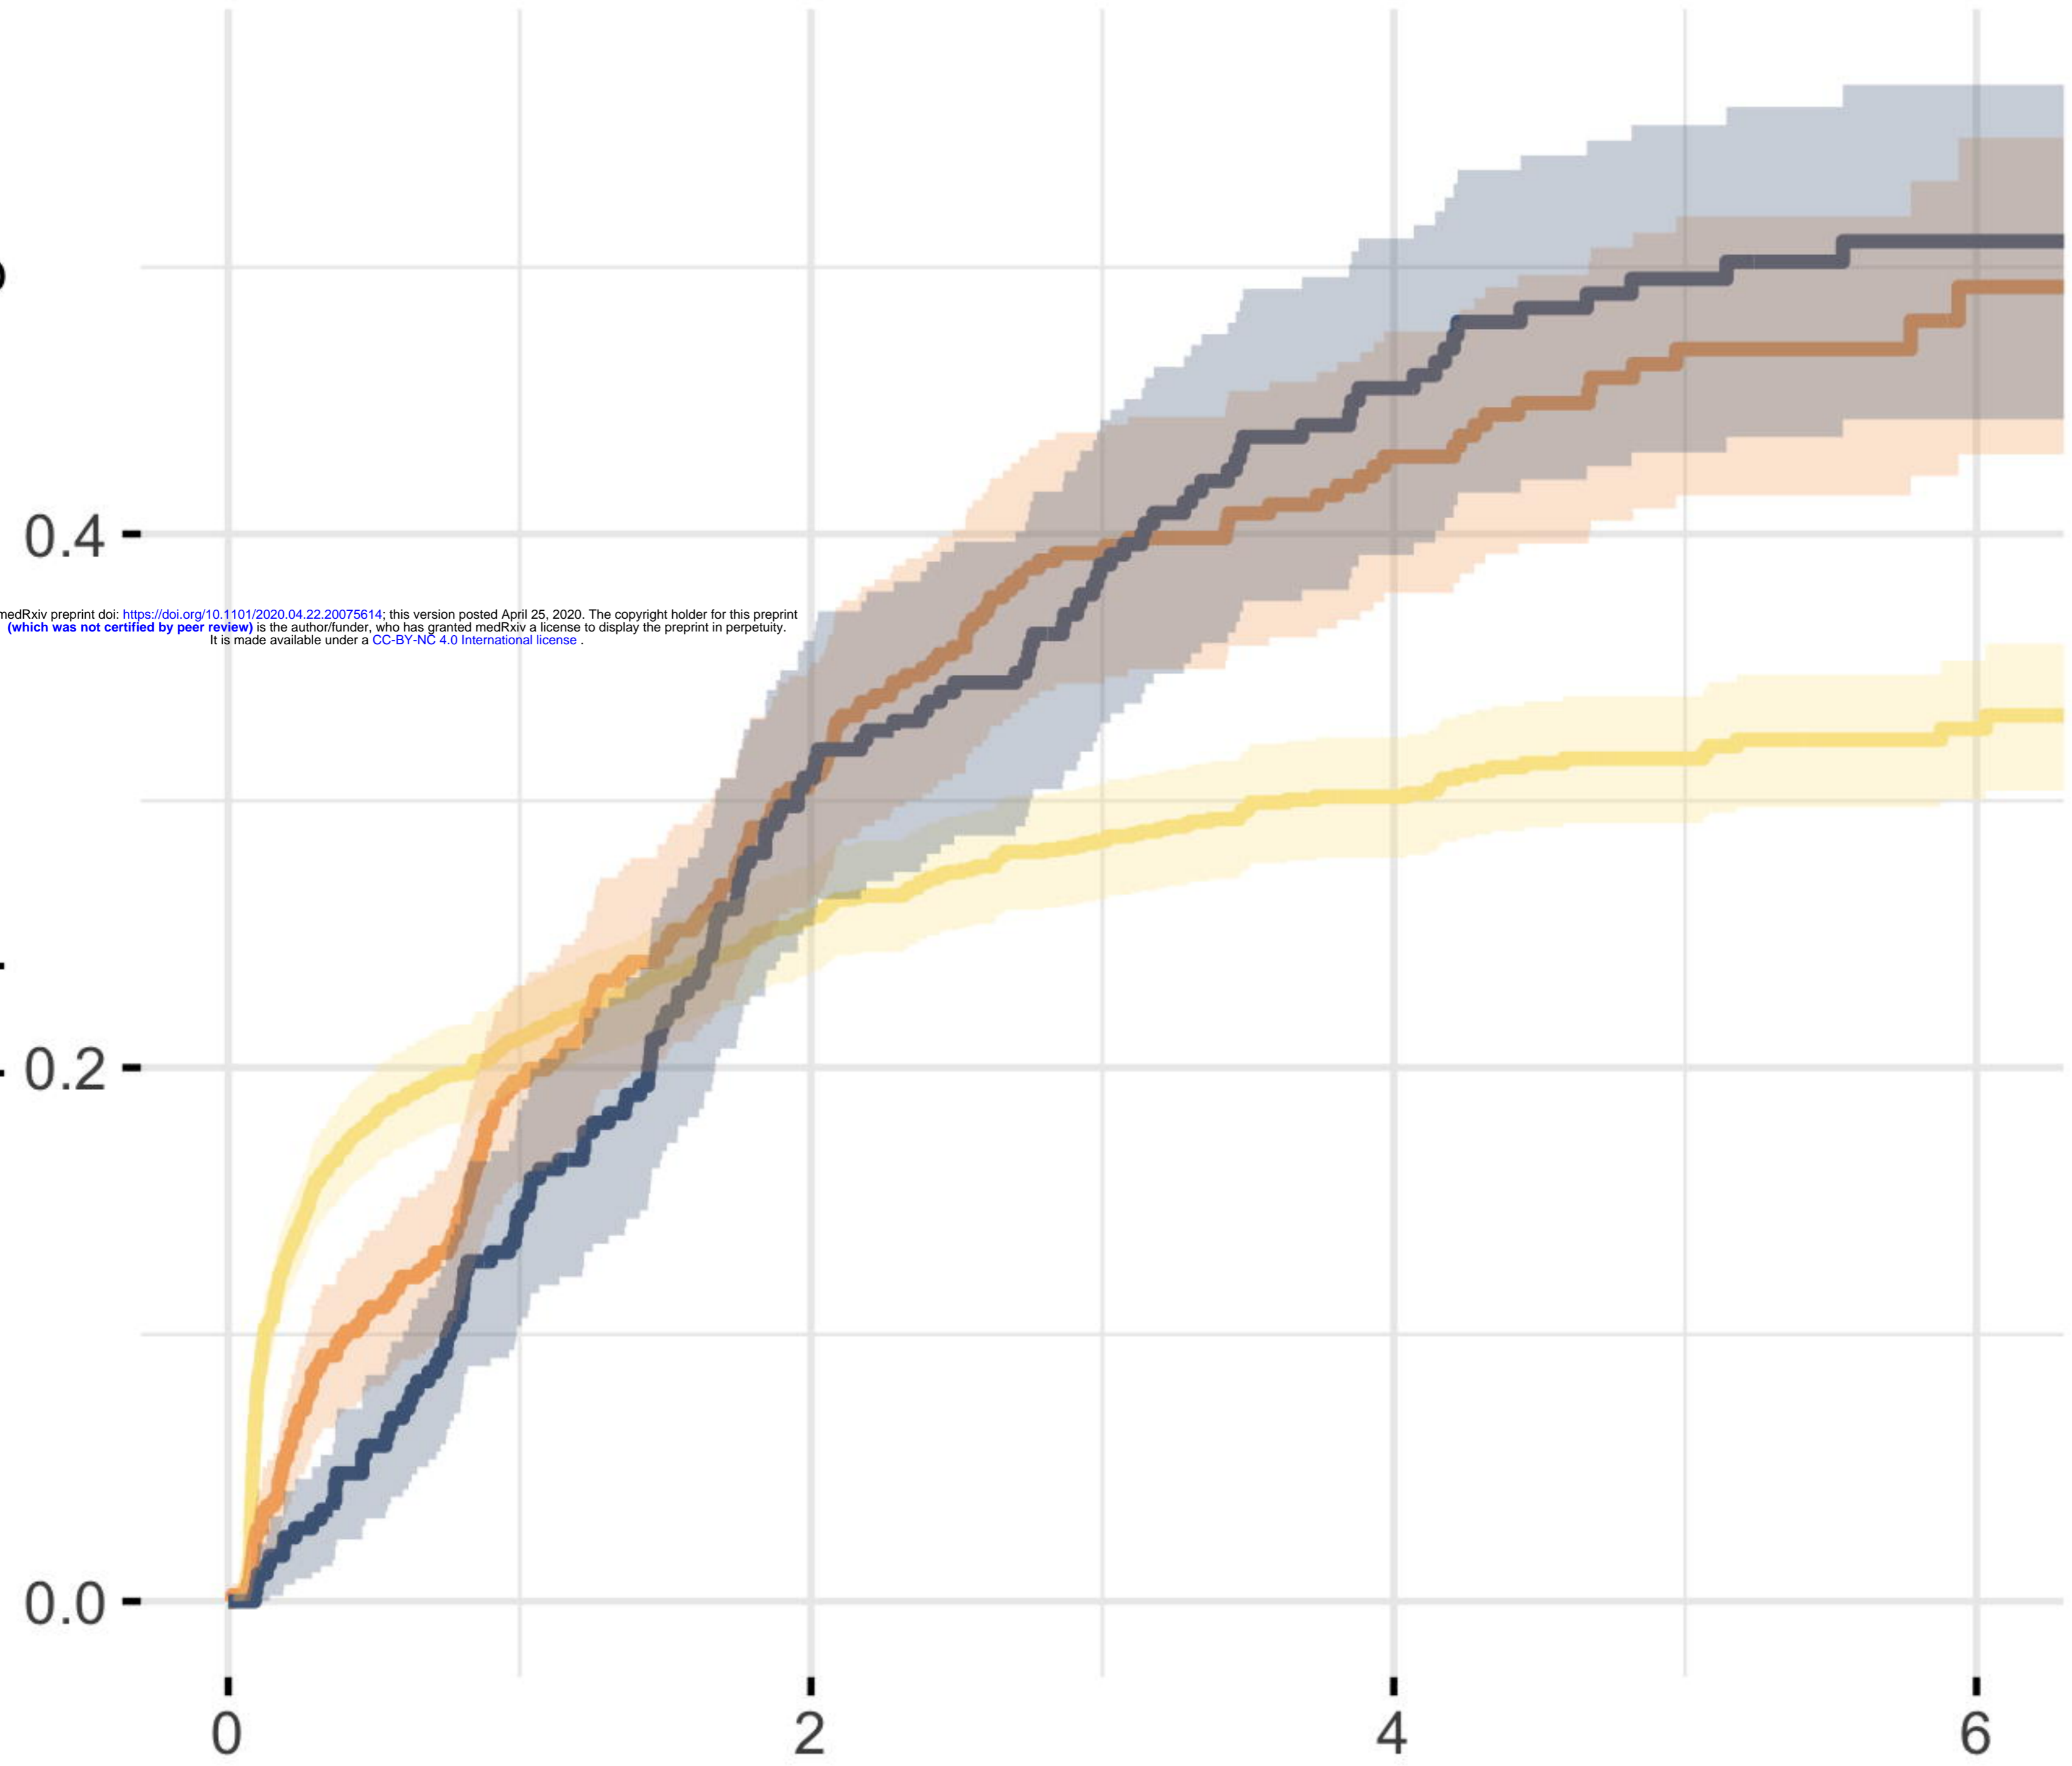

- 1 episode
- 2 episodes
- >= 3 episodes

Time since first PEP consultation (years)

Cumulative proportion of PrEP linkage

medRxiv preprint doi: <https://doi.org/10.1101/2020.04.22.20075314>; this version posted April 25, 2020. The copyright holder for this preprint (which was not certified by peer review) is the author/funder, who has granted medRxiv a license to display the preprint in perpetuity. It is made available under a [CC-BY-NC 4.0 International license](#).

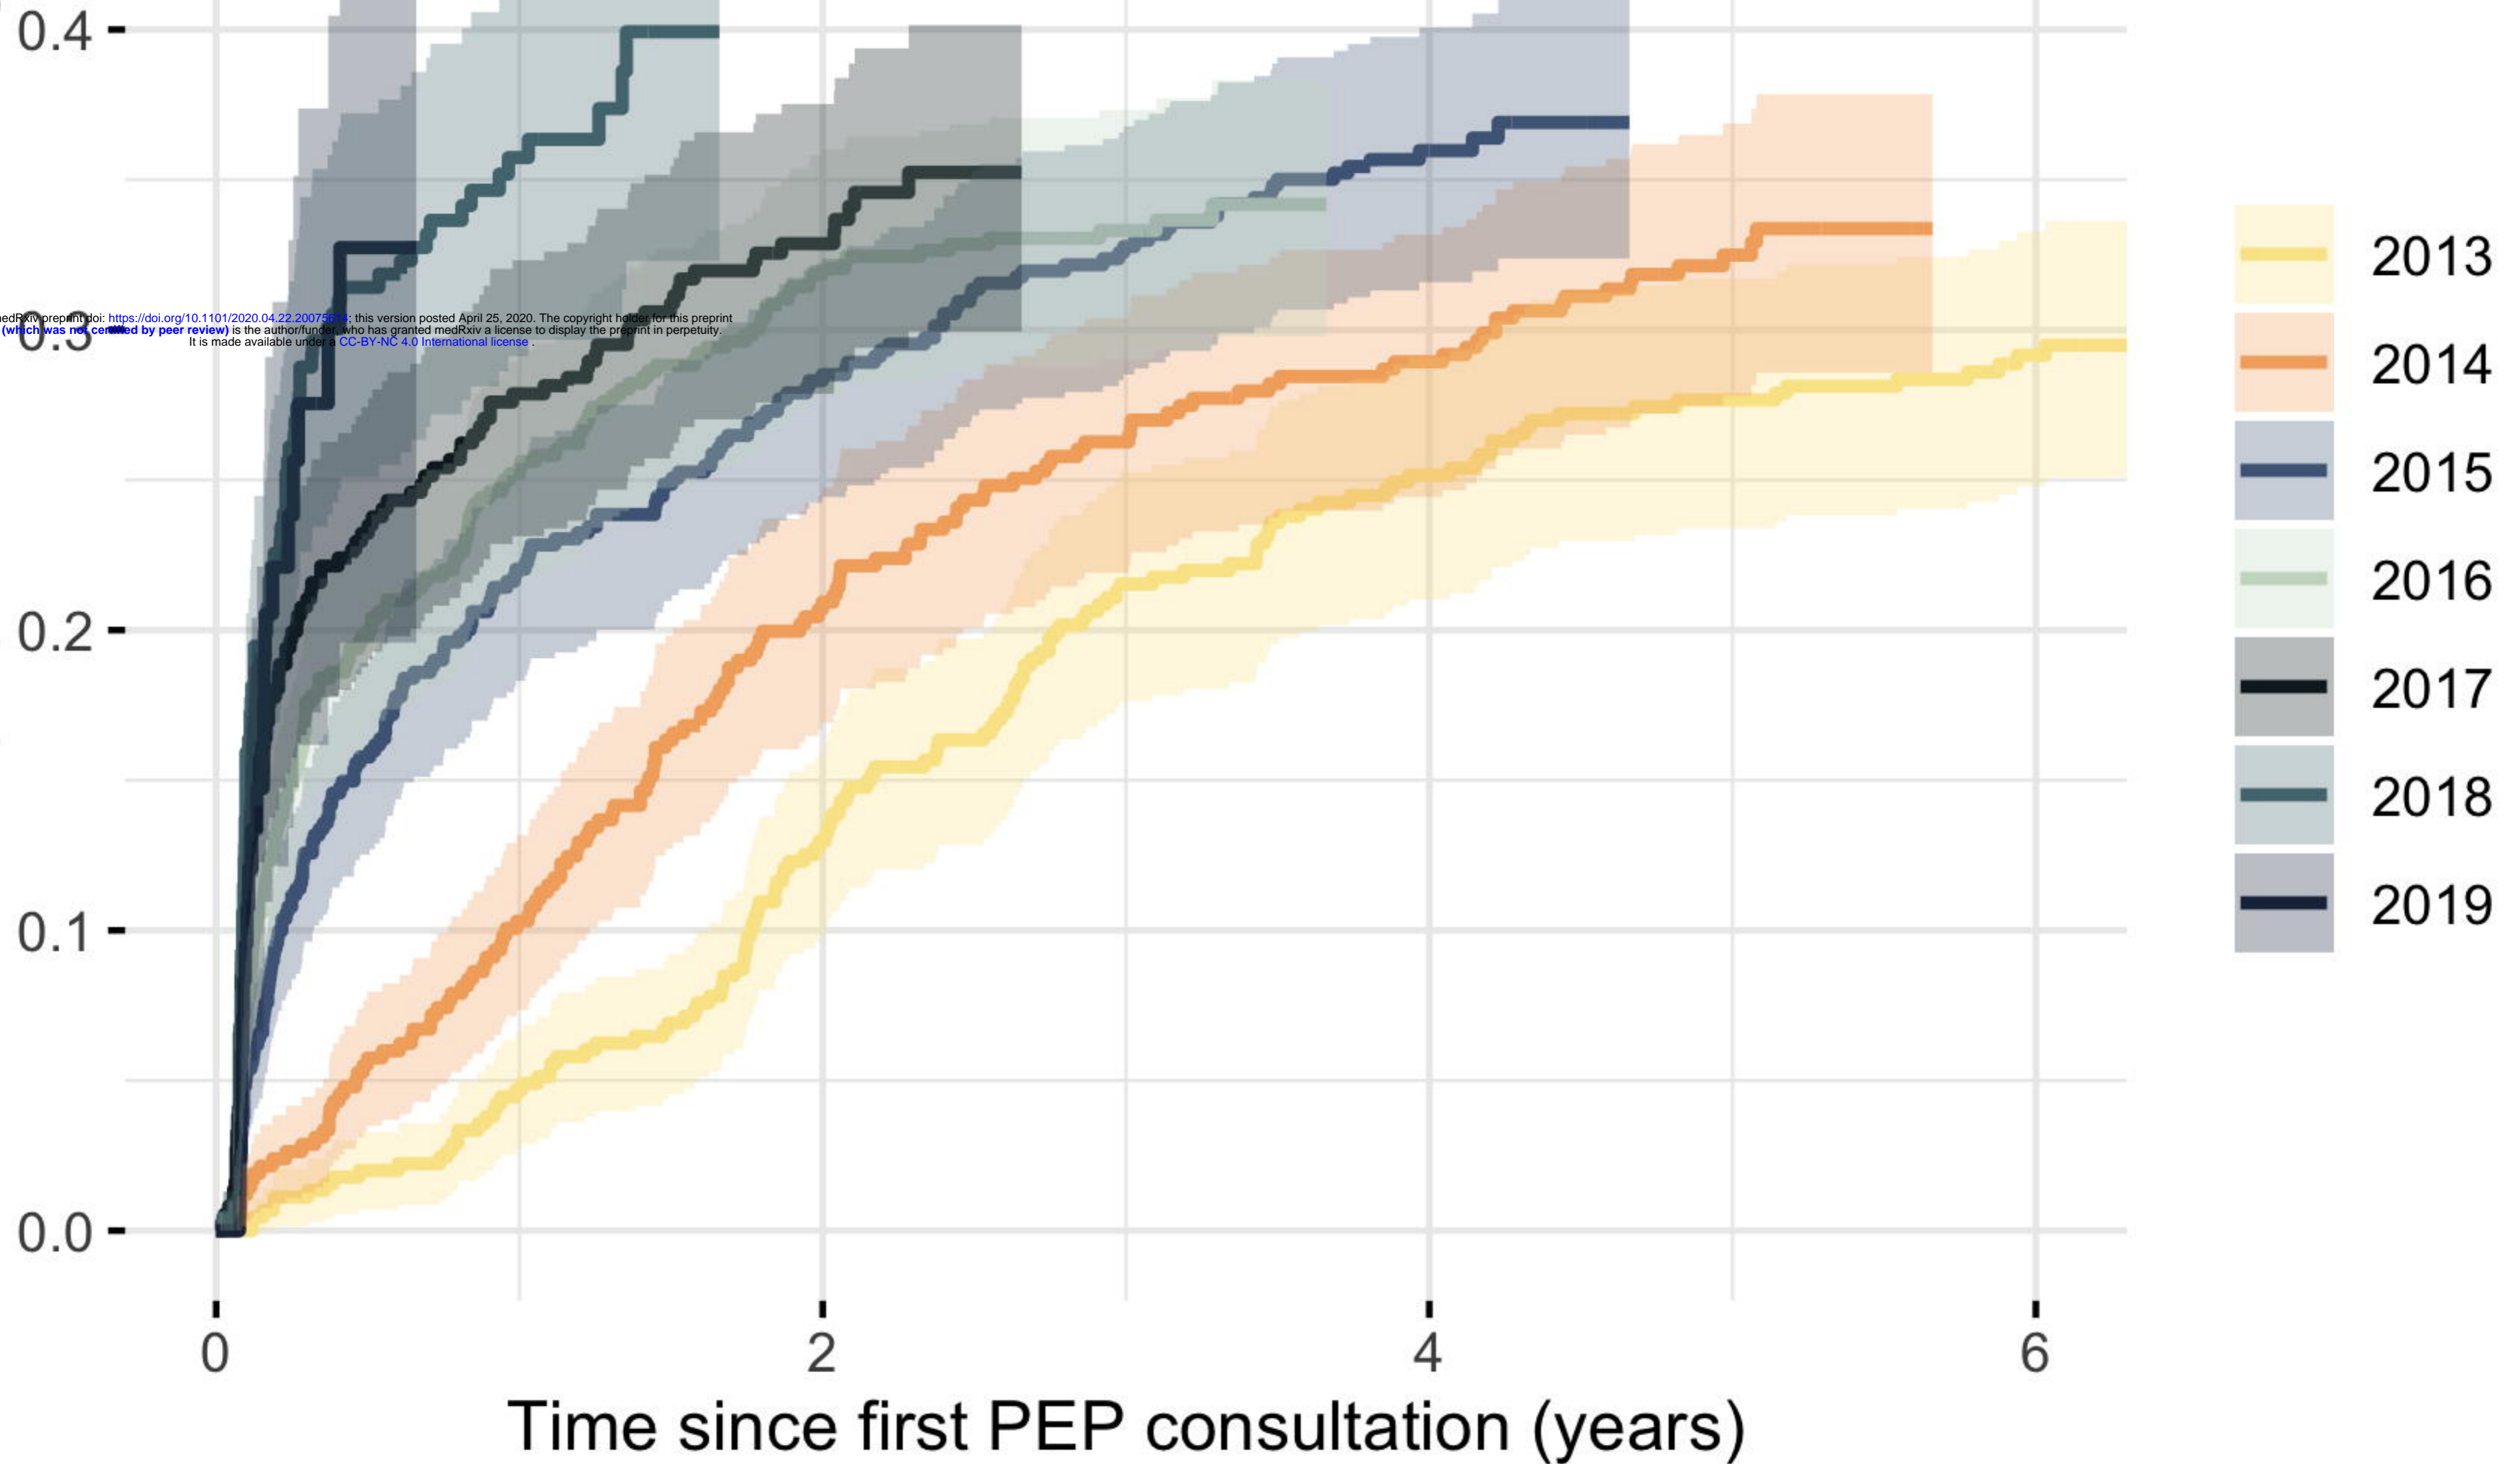

Proportion persistent on PrEP

medRxiv preprint doi: <https://doi.org/10.1101/2020.04.22.20075614>; this version posted April 25, 2020. The copyright holder for this preprint (which was not certified by peer review) is the author/funder, who has granted medRxiv a license to display the preprint in perpetuity. It is made available under a [CC-BY-NC 4.0 International license](#).

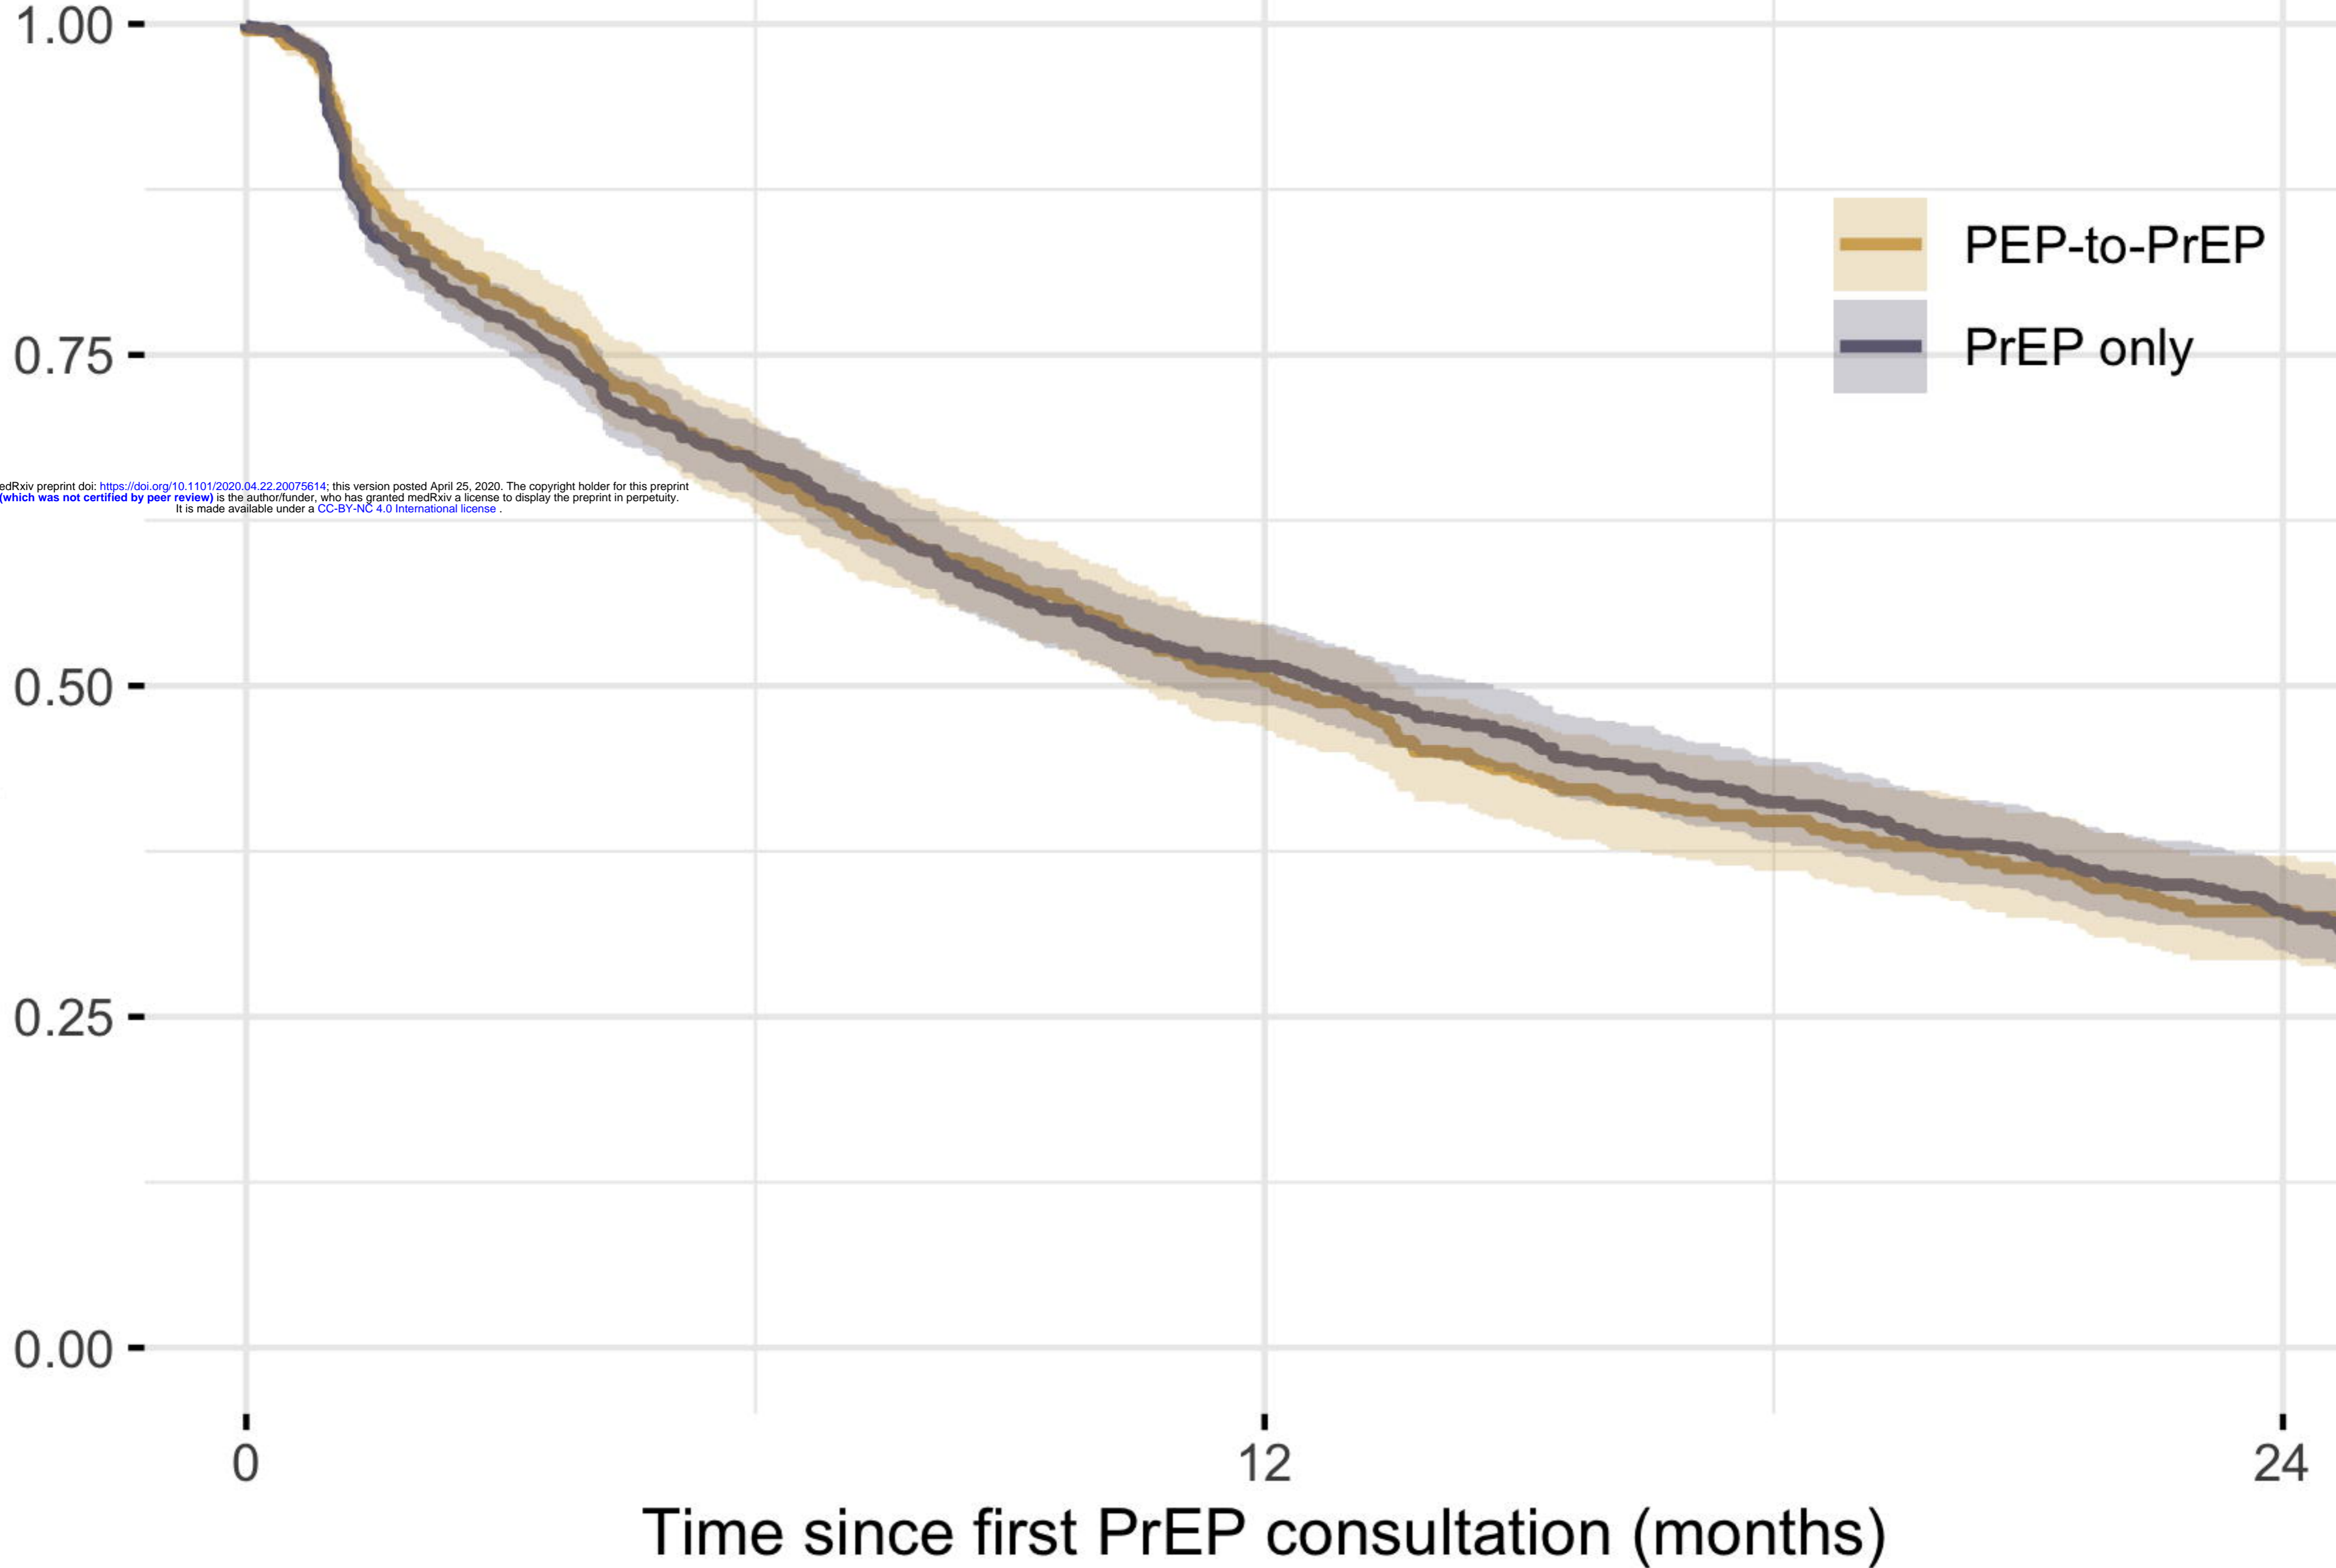

Source: https://medrxiv.org/content/10.1101/2020.04.22.20075614v1.full.pdf
